# Supplementary material for: Gut microbial metabolite- PE(0:0/14:0) could inhibit sepsis-induced intestinal injury
Source: Research Square preprint supplement (doi:10.21203/rs.3.rs-2830724/v1), 2023-04-24
Supplement: Supplementary file 1 [file fa5012a20e74f40ee95bd4e5.xlsx]

## Sheet: Sheet1
	Table 1: The top 20 differential metabolites between the two group( Sepsis vs Healthy)
	Metabolites	VIP	P-value	Sepsis 1	Sepsis 2	Sepsis 3	Sepsis 4	Sepsis 5	Sepsis 6	Sepsis 7	Sepsis 8	Sepsis 9	Sepsis 10	Healthy1	Healthy2	Healthy3	Healthy4	Healthy5	Healthy6	Healthy7	Healthy8	Healthy9	Healthy10
	N-oleoyl threonine	2.10489	3.55258e-10	604.622	581.589	542.388	610.923	585.232	531.653	20.1502	75.6616	52.8104	123.96	6.25352	41.1902	0.282676	0.731589	8.20081	0.0374575	2.02295	6.97416	0.635255	9.81402
	7S,8S-DiHODE	3.05619	4.39905e-08	238.079	344.119	539.314	236.841	317.806	247.879	1561.61	1238.17	1414.82	1574.75	1548.66	1294.33	47.4478	54.8242	18.0099	36.917	19.5882	52.8581	43.1296	6.36124
	Minabeolide-5	1.20704	8.0317e-08	7.96237e-09	1.64198	22.6521	1.96172	2.35095	7.96237e-09	223.619	147.716	157.604	203.927	160.262	177.923	7.96237e-09	3.21256	106.292	23.9918	7.25555	13.4571	6.65047	7.85483
	Psoralidin	1.11498	1.5252e-07	133.924	152.384	189.271	185.629	189.22	137.672	7.62788	11.44	16.7519	7.39062	34.2523	20.7751	166.656	55.6537	16.4847	57.9982	33.3568	21.6983	56.9828	4.63196
	PI(20:2(11Z,14Z)/0:0)	1.09236	2.28432e-06	9.48612	43.1663	92.9628	16.0177	3.79601	11.6098	177.477	171.658	163.619	206.735	176.032	164.299	372.652	300.232	230.222	290.398	241.738	273.683	339.402	333.866
	27-nor-22R-hydroxy-5alpha-cholestan-3,6-dione	1.29685	2.6012e-06	17.1271	35.024	75.9605	32.7579	18.4272	17.1207	286.651	165.433	227.644	296.803	219.1	234.589	13.2234	5.48491	3.00213	10.8601	7.66708	7.47633	9.22897	1.24723
	Eletriptan N-oxide	1.41527	2.67471e-06	7.96237e-09	7.96237e-09	4.92304	7.96237e-09	7.96237e-09	7.96237e-09	240.898	130.551	232.058	300.64	277.674	298.785	2.89617	13.606	40.7102	4.84104	33.3251	16.2582	3.90184	77.4625
	PA(P-16:0/17:2(9Z,12Z))	1.24958	3.81409e-06	8.9152	41.1408	73.767	5.55022	13.0571	10.2003	196.876	287.115	215.141	263.493	157.505	227.363	0.622998	0.710823	5.55932	3.46236	1.90253	0.117331	7.96237e-09	1.87445
	Broussonol A	1.36295	5.20201e-06	147.887	125.422	90.132	168.179	124.164	107.916	362.419	367.64	445.892	384.335	265.349	339.642	263.766	428.25	700.712	359.795	439.578	407.189	278.699	603.752
	ent-9-L1-PhytoP	6.42754	5.2071e-06	23.0434	11.0905	17.6445	5.39296	10.739	4.95236	4903.12	2648.57	5090.64	5224.35	5792.19	6992.94	119.827	84.343	77.6636	24.7734	179.026	31.0098	8.9242	148.281
	Avocadyne	1.63355	5.681e-06	40.0339	172.115	186.199	86.9172	77.6105	68.5084	374.396	344.944	422.785	537.709	476.439	491.792	52.0066	42.315	22.0546	75.0722	49.9109	62.326	95.5201	13.1958
	PGF2alpha dimethyl amide	1.33515	5.7171e-06	453.227	285.007	341.144	339.496	373.462	356.379	139.376	162.424	159.707	151.203	88.1832	107.139	55.8704	55.9652	44.1442	34.7659	34.7802	43.253	74.5309	84.0246
	3-butyrl propionic acid	1.44551	6.36683e-06	309.398	491.758	404.263	488.524	393.522	390.689	135.415	135.092	173.453	123.399	148.806	199.188	7.96237e-09	2.14509	20.568	0.323954	2.08735	2.29059	3.06989	17.203
	N-Linoleoyl GABA	3.13637	6.79716e-06	2050.32	1086.26	1212.8	1347.41	1539.45	1391.7	138.137	247.184	207.894	385.259	40.7435	164.936	543.662	658.519	586.968	826.914	725.511	431.077	945.181	499.423
	N-stearoyl histidine	1.04028	1.11375e-05	13.4207	23.0676	81.7809	25.7904	15.8888	14.781	162.772	149.593	136.866	128.748	203.014	198.125	91.4417	69.8985	76.2549	70.185	63.9267	83.1493	108.907	51.9002
	14,15-LTC4	1.27854	1.28234e-05	5.64652	32.3442	106.402	9.06082	1.46704	8.57641	241.016	252.692	188.277	172.469	306.002	220.037	7.96237e-09	7.96237e-09	7.96237e-09	7.96237e-09	7.96237e-09	7.96237e-09	7.96237e-09	7.96237e-09
	Ginsenoside Rh1	1.17853	2.15616e-05	7.96237e-09	4.02015	13.3111	8.05591	4.36054	5.58072	277.637	179.154	149.115	111.127	158.071	190.518	500.841	398.359	467.639	244.923	416.543	784.019	398.432	583.631
	Jalapinolic acid	1.3636	2.55702e-05	153.009	243.783	321.684	159.335	183.998	139.995	423.618	376.955	442.728	485.273	433.218	477.159	3.2631	17.74	47.3416	10.0612	21.3269	23.7676	1.21586	33.7477
	2,5-dimethoxystilbene	4.12713	2.68269e-05	17.2688	1028.05	1287.03	334.173	311.553	283.272	2950.05	1635.9	2950.1	2958.5	2994.35	2721.76	844.158	1145.6	302.772	1694.95	127.916	458.498	3470.96	35.0075
	PE(0:0/14:0)	1.16461	2.68656e-05	17.2198	50.2287	36.1333	51.3478	16.9166	17.6572	307.351	181.455	181.671	162.641	173.414	186.28	132.051	47.3455	26.0764	85.8133	59.8766	82.9069	132.543	15.0705
